# Supplementary material for: Cycling of potassium–carbonate co-substituted hydroxyapatite compositions for improved carbon dioxide capture at 500 °C
Source: Royal Society of Chemistry journal article supplement (doi:10.1039/d3ma00909b), 2023-11-22
Supplement: d3ma00909b1.pdf [file d3ma00909b1.pdf]

1 **Cycling of Potassium-Carbonate Co-Substituted Hydroxyapatite Compositions for**  
2 **Improved Carbon Dioxide Capture at 500°C**

3

4 **Duncan A. Nowicki, Iain R. Gibson and Janet M. S. Skakle**

5 **Supplementary Material**

6

7

8

9

10

11

12

Table SM 1 The quantities (in moles) of the reactants used to prepare the apatites studied in this work. The value of x refers to the designed molar substitution of potassium and carbonate ions on calcium and phosphate sites respectively, in accordance with the design composition formula  $\text{Ca}_{10-x}\text{K}_x(\text{PO}_4)_{6-x}(\text{CO}_3)_x(\text{OH})_2$ .

| <b>Design x</b> | <b>Ca(OH)<sub>2</sub><br/>(moles)</b> | <b>K<sub>2</sub>CO<sub>3</sub><br/>(moles)</b> | <b>H<sub>3</sub>PO<sub>4</sub><br/>(moles)</b> | <b>Design<br/>Ca/P</b> | <b>Design<br/>(Ca+K)/P</b> |
|-----------------|---------------------------------------|------------------------------------------------|------------------------------------------------|------------------------|----------------------------|
| <b>0</b>        | 0.11                                  | N/A                                            | 0.066                                          | 1.67                   | N/A                        |
| <b>0.5</b>      | 0.1045                                | 0.00275                                        | 0.0605                                         | 1.73                   | 1.82                       |
| <b>1.0</b>      | 0.099                                 | 0.0055                                         | 0.055                                          | 1.80                   | 2.00                       |
| <b>2.0</b>      | 0.088                                 | 0.0110                                         | 0.044                                          | 2.00                   | 2.50                       |
| <b>2.5</b>      | 0.0825                                | 0.01375                                        | 0.0385                                         | 2.14                   | 2.86                       |

13

14

15

16

17

18

19

20

21

22

23

24

25

26

27  
28  
29  
30

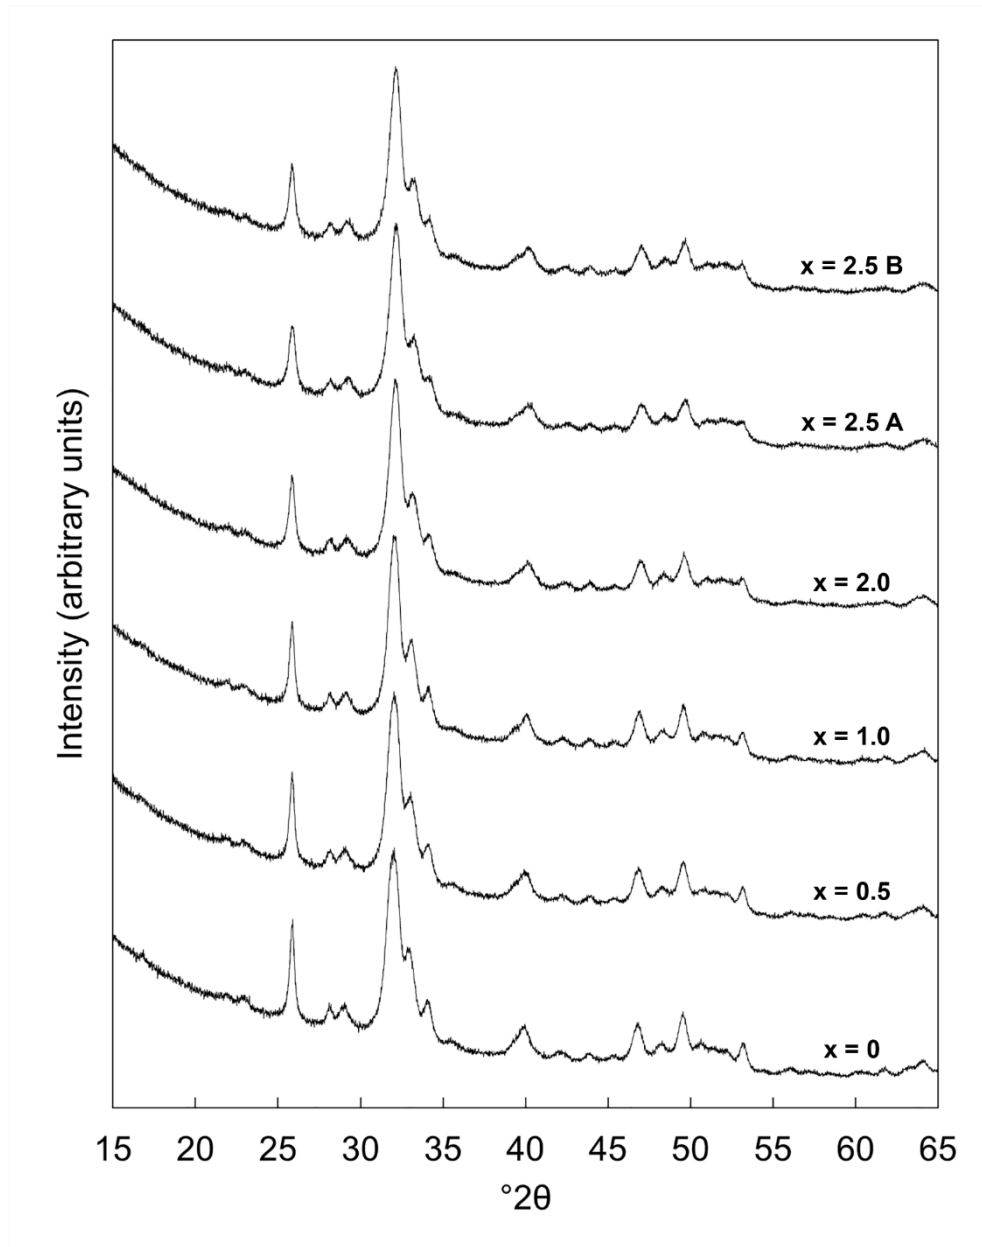

FigureSM 1 Normalised ( $I_{\max} = 100$ ) X-ray diffraction patterns of each of the as-prepared apatite materials, where  $x = 0-2.5$  in the design formula  $\text{Ca}_{10-x}\text{K}_x(\text{PO}_4)_6-x(\text{CO}_3)_x(\text{OH})_2$ . 'A' denotes the  $x = 2.5$  sample that was thrice cycled whereas 'B' marks the  $x = 2.5$  apatite that was subjected to 15 carbonation-regeneration cycles at  $500^\circ\text{C}$  in  $\text{CO}_2$  and air respectively.

31  
32  
33  
34

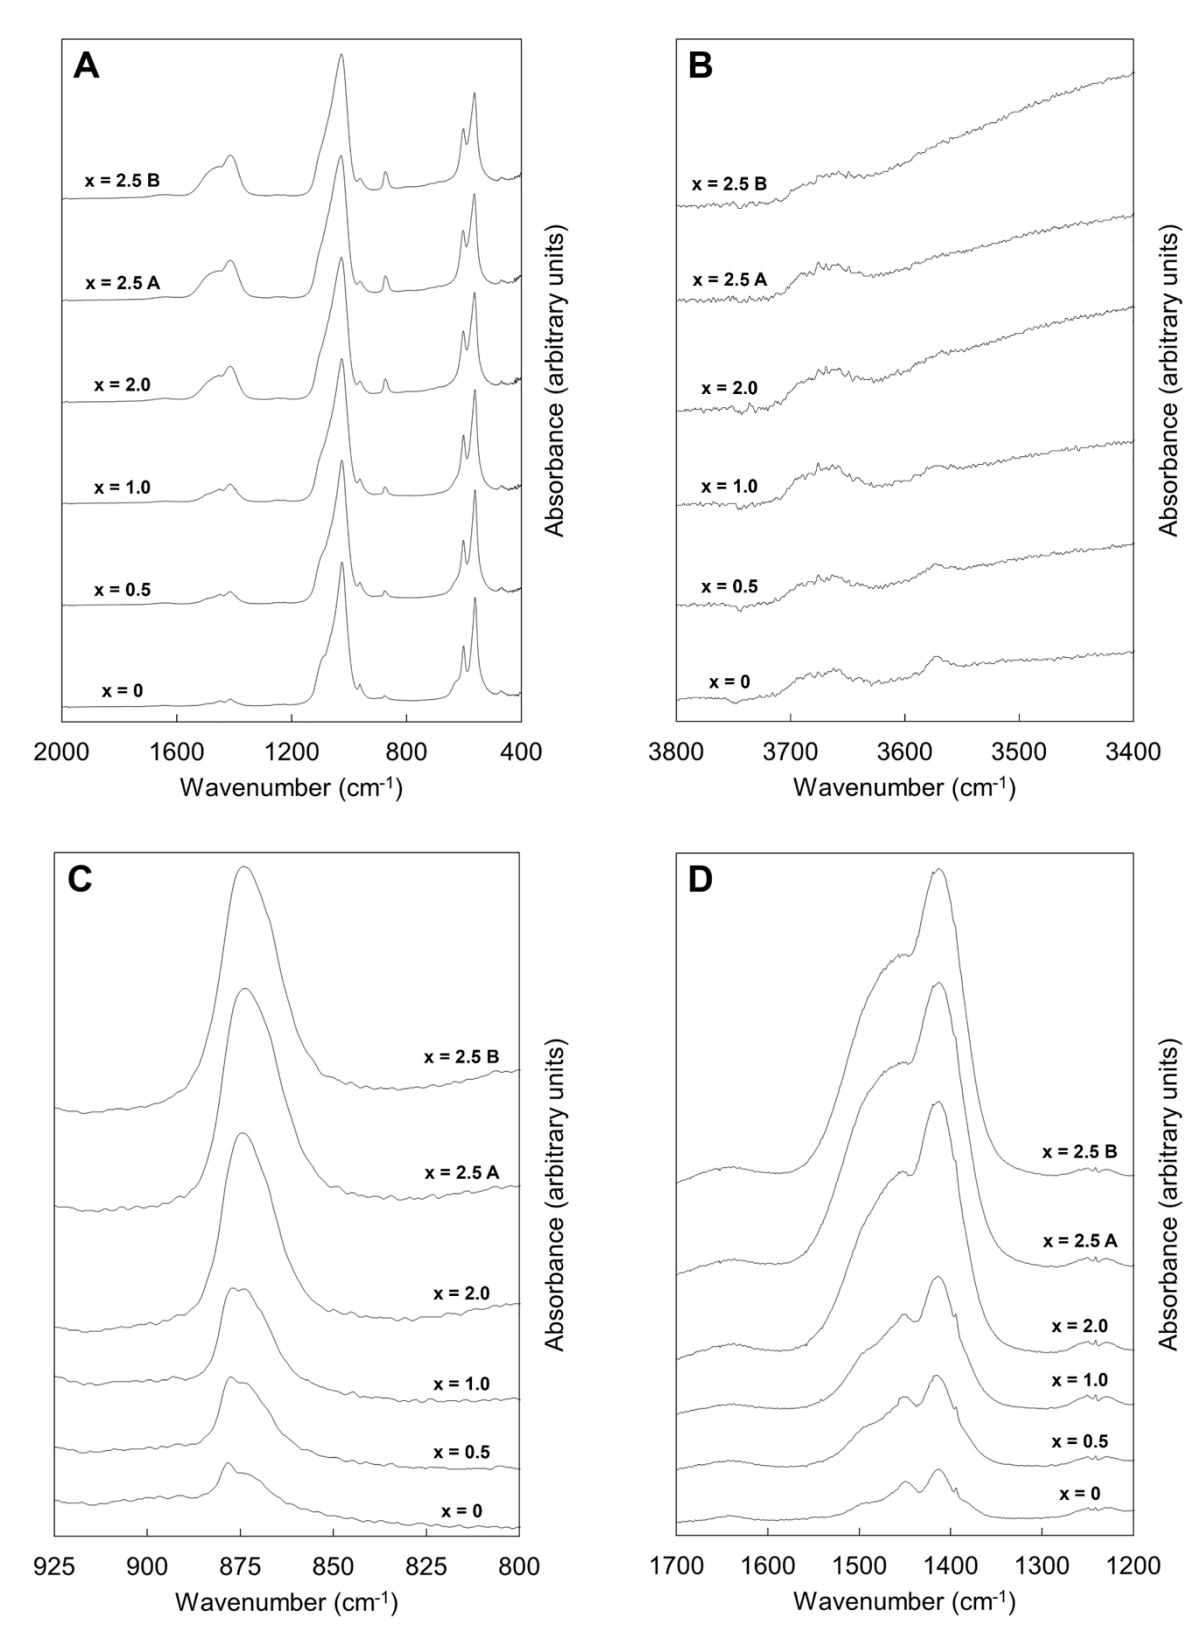

FigureSM 2 Normalised (A<sub>max</sub> = 100) FTIR spectra between (A) 2000-400, (B) 3800-3400, (C) 925-800 and (D) 1700-1200 cm<sup>-1</sup> of each of the as-prepared apatites, where x = 0-2.5 in the design formula  $\text{Ca}_{10-x}\text{K}_x(\text{PO}_4)_{6-x}(\text{CO}_3)_x(\text{OH})_2$ . 'x = 2.5 A' denotes the sample that was thrice cycled whereas 'x = 2.5 B' marks the apatite subjected to 15 cycles.

36  
37  
38  
39  
40  
41  
42  
43  
44  
45  
46  
47

Table SM 2 Carbonate contents (wt%) of each of the as-prepared apatites. Also shown are the lattice parameters of these materials, determined by simple Rietveld refinement of collected XRD data. 'A' denotes the  $x = 2.5$  sample that was thrice cycled whereas 'B' marks the  $x = 2.5$  apatite that was subjected to 15 carbonation-regeneration cycles at 500°C in CO<sub>2</sub> and air respectively.

| <b>Design x</b> | <b>CO<sub>3</sub><sup>2-</sup> (wt%)</b> | <b>a parameter</b> | <b>c parameter</b> |
|-----------------|------------------------------------------|--------------------|--------------------|
| <b>0</b>        | 1.94 ± 0.02                              | 9.4039(5)          | 6.8882(6)          |
| <b>0.5</b>      | 3.88 ± 0.01                              | 9.3852(6)          | 6.8902(6)          |
| <b>1.0</b>      | 5.48 ± 0.04                              | 9.3726(5)          | 6.8916(5)          |
| <b>2.0</b>      | 9.95 ± 0.07                              | 9.3456(6)          | 6.8910(7)          |
| <b>2.5 A</b>    | 12.93 ± 0.11                             | 9.3326(7)          | 6.8890(7)          |
| <b>2.5 B</b>    | 12.53 ± 0.04                             | 9.3375(7)          | 6.8906(8)          |

48  
49  
50  
51  
52  
53  
54  
55  
56  
57  
58  
59  
60



62  
63  
64  
65  
66

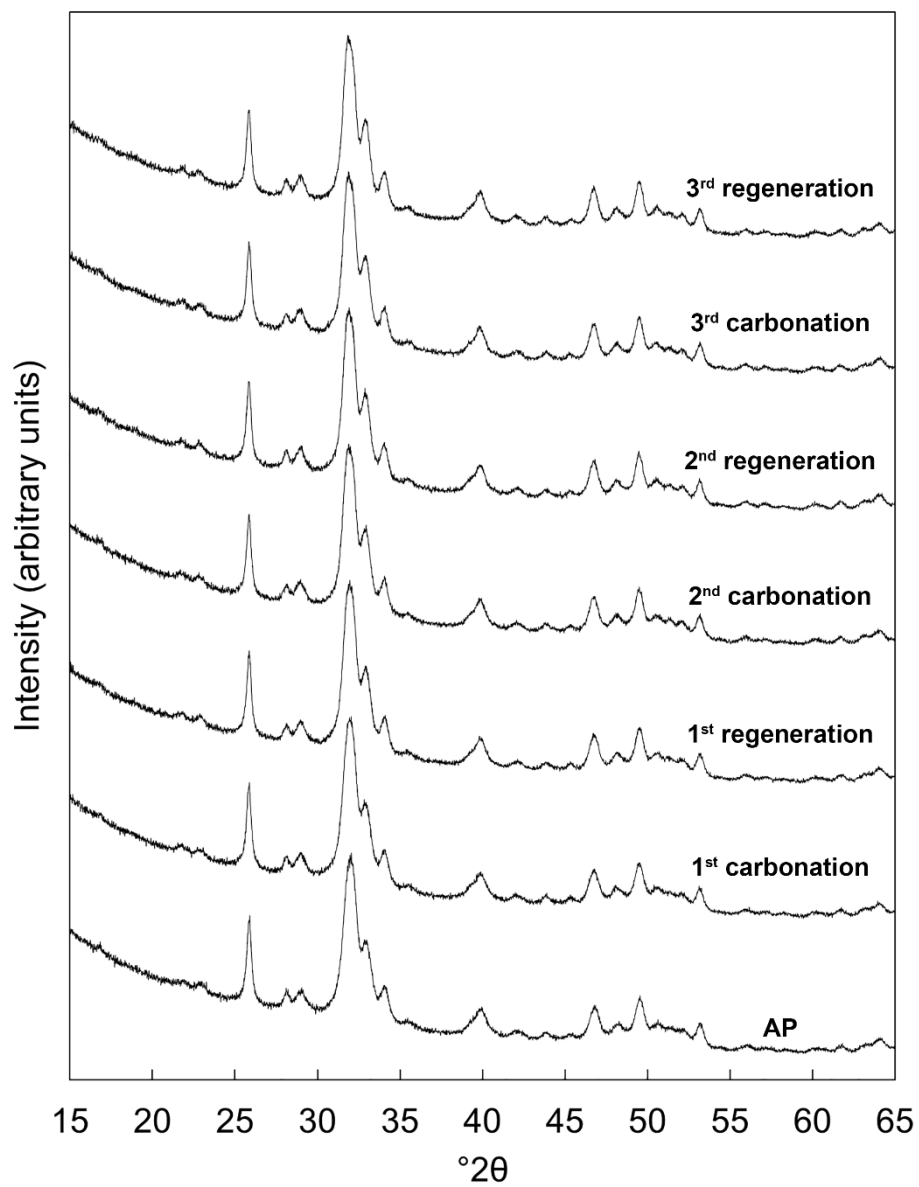

FigureSM 3 Normalised ( $I_{\max} = 100$ ) XRD patterns of the  $x = 0$  apatite as-prepared (AP) and over three carbonation-regeneration cycles at 500 $^{\circ}$ C in dry CO<sub>2</sub> and air respectively.

67  
68  
69  
70  
71

72  
73  
74  
75  
76

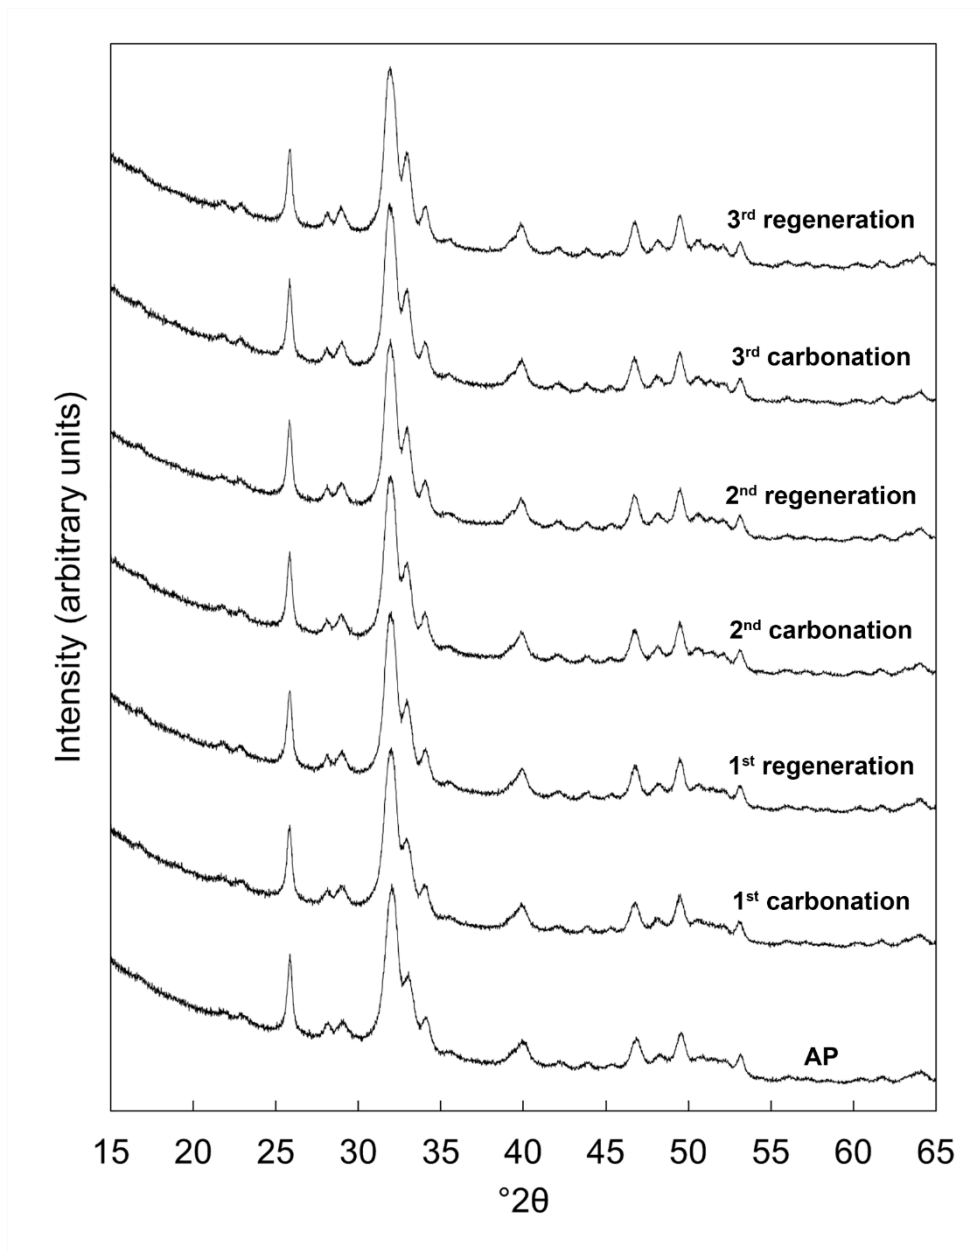

FigureSM 4 Normalised ( $I_{\max} = 100$ ) XRD patterns of the  $x = 0.5$  apatite as-prepared (AP) and over three carbonation-regeneration cycles at 500°C in dry  $\text{CO}_2$  and air respectively.

77  
78  
79  
80  
81

82  
83  
84  
85  
86

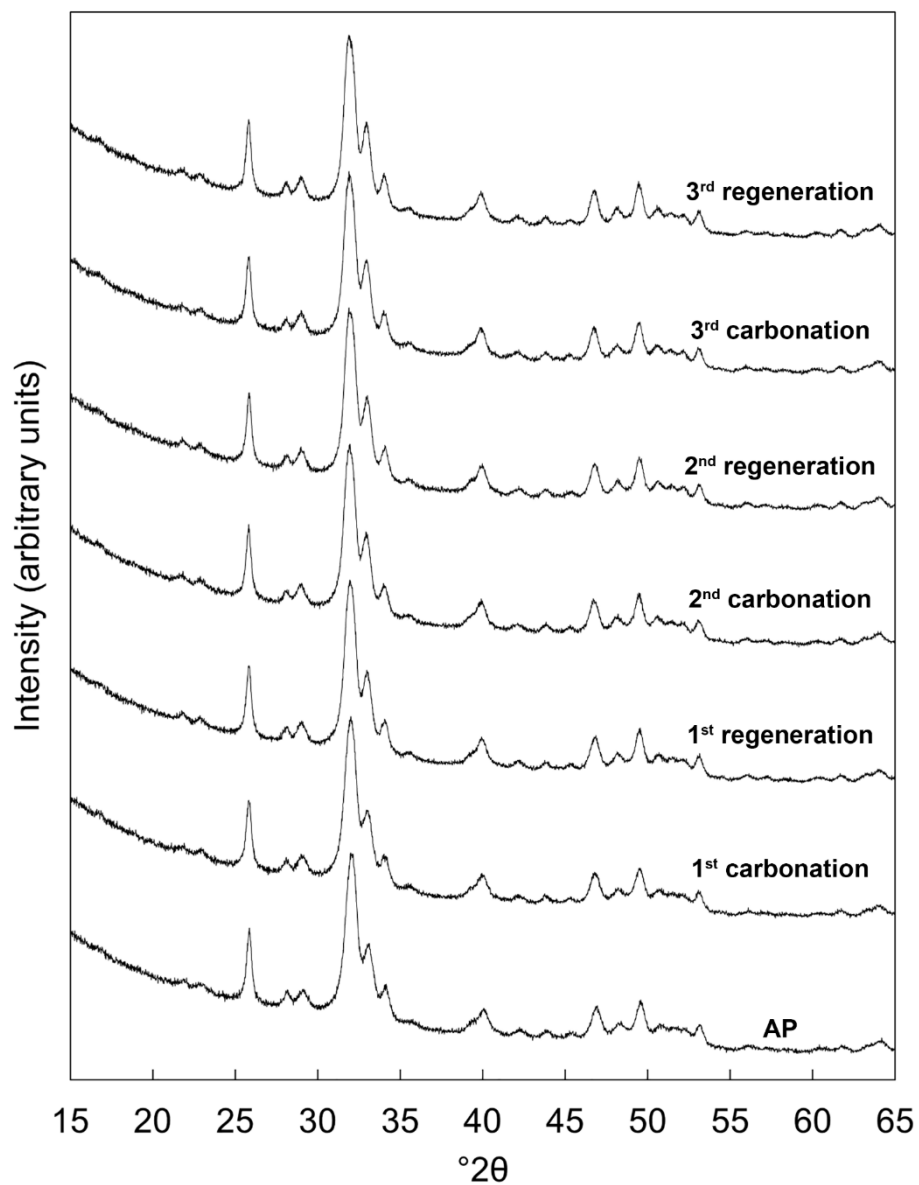

FigureSM 5 Normalised ( $I_{\max} = 100$ ) XRD patterns of the  $x = 1.0$  apatite as-prepared (AP) and over three carbonation-regeneration cycles at 500°C in dry  $\text{CO}_2$  and air respectively.

87  
88  
89  
90  
91



92  
93  
94  
95  
96

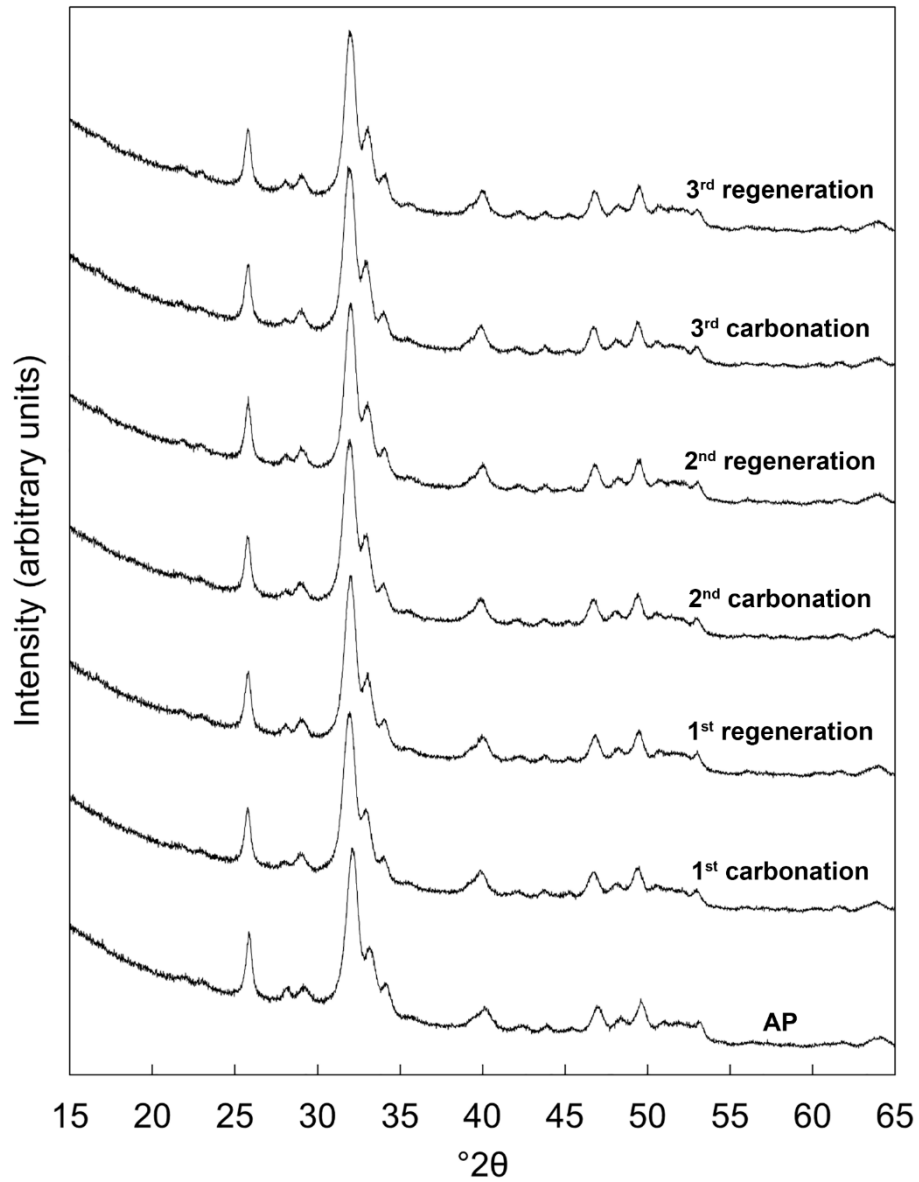

FigureSM 6 Normalised ( $I_{\max} = 100$ ) XRD patterns of the  $x = 2.0$  apatite as-prepared (AP) and over three carbonation-regeneration cycles at 500°C in dry  $\text{CO}_2$  and air respectively.

97  
98  
99  
100  
101

102  
103  
104  
105  
106  
107  
108  
109  
110

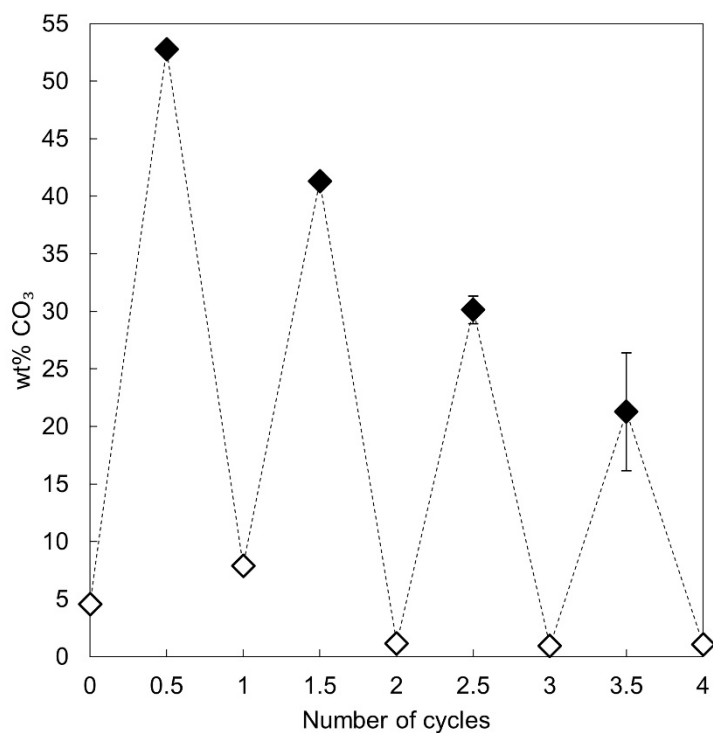

FigureSM 7 Measured carbonate content of calcium oxide as-prepared (i.e. when the number of cycles = 0) and over three cycles. Carbonation was performed in dry CO<sub>2</sub> at 650°C and regeneration in air at 900°C. Carbonated samples are represented by filled markers whilst as-prepared and samples heated in air are denoted using open markers.

111  
112  
113  
114  
115  
116  
117  
118  
119
